# Supplementary material for: The Embedded Agroecology of Coffee Agroforestry: A Contextualized Review of Smallholder Farmers’ Adoption and Resistance
Source: MDPI journal article supplement (doi:10.3390/su15086827), 2023-04-18
Supplement: s1 [file s1]

Archive with 1 entries (1 files):
- sustainability-2269891-supplementary.pdf
